# Supplementary material
Source: publisher figshare collection journal article supplement (https://future-science-group.figshare.com/ndownloader/files/31135972)
Supplement: Supplementary file 1 [file 31135972]

**Supplementary Materials**

**Table 1. Standard First and Second LOT Regimens1**

| Role in Study Design | Regimen Name | Regimen Drugs |
| --- | --- | --- |
| Standard First Line to qualify for study | R-CHOP | cyclophosphamide, doxorubicin, vincristine, prednisone +/- rituximab |
| Dose-adjusted EPOCH | etoposide, prednisone, vincristine, cyclophosphamide, doxorubicin +/- rituximab |
| Second Line with Intent to Proceed to Transplant;  all other 2nd LOT regimens classified a patient as ASCT-not-intended | DHAP | dexamethasone, cisplatin/carboplatin, cytarabine +/- rituximab |
| DHAX | dexamethasone, cytarabine, oxaliplatin +/- rituximab |
| ESHAP | etoposide, methylprednisolone, cytarabine, cisplatin +/- rituximab |
| GDP | gemcitabine, dexamethasone, cisplatin/carboplatin +/- rituximab |
| GemOx | gemcitabine, oxaliplatin +/- rituximab |
| ICE | ifosfamide, carboplatin, etoposide +/- rituximab |
| MINE | mesna, ifosfamide, mitoxantrone, etoposide +/- rituximab |

1NCCN Guidelines®, B-cell Lymphomas Version 4.2020 – August 13, 2020

**Table 2. Qualifying Stem-cell Treatment Codes**

| **Code** | **Code Type** | **Description** | **SCT TYPE** |
| --- | --- | --- | --- |
| 38240 | CPT | Allogeneic Hematopoietic Stem Cell Transplantation | ALLO |
| 38241 | CPT | Autologous Stem Cell Transplantation | AUTO |
| 38242 | CPT | Allogeneic donor lymphocyte infusion | ALLO |
| 014 | DRG | Allogeneic bone marrow transplant | ALLO |
| 015 | DRG | Autologous bone marrow transplant | AUTO |
| 016 | DRG | Autologous bone marrow transplant w CC/MCC | AUTO |
| 017 | DRG | Autologous bone marrow transplant w/o CC/MCC | AUTO |
| 30230G0 | ICD-10 | Transfusion of Autologous Bone Marrow into Peripheral Vein, Open Approach | AUTO |
| 30230G1 | ICD-10 | Transfusion of Nonautologous Bone Marrow into Peripheral Vein, Open Approach | ALLO |
| 30230Y0 | ICD-10 | Transfusion of Autologous Hematopoietic Stem Cells into Peripheral Vein, Open Approach | AUTO |
| 30230Y1 | ICD-10 | Transfusion of Nonautologous Hematopoietic Stem Cells into Peripheral Vein, Open Approach | ALLO |
| 30230Y2 | ICD-10 | Transfusion of Allogeneic Related Hematopoietic Stem Cells into Peripheral Vein, Open Approach | ALLO |
| 30230Y3 | ICD-10 | Transfusion of Allogeneic Unrelated Hematopoietic Stem Cells into Peripheral Vein, Open Approach | ALLO |
| 30230Y4 | ICD-10 | Transfusion of Allogeneic Unspecified Hematopoietic Stem Cells into Peripheral Vein, Open Approach | ALLO |
| 30233G0 | ICD-10 | Transfusion of Autologous Bone Marrow into Peripheral Vein, Percutaneous Approach | AUTO |
| 30233G1 | ICD-10 | Transfusion of Nonautologous Bone Marrow into Peripheral Vein, Percutaneous Approach | ALLO |
| 30233Y0 | ICD-10 | Transfusion of Autologous Hematopoietic Stem Cells into Peripheral Vein, Percutaneous Approach | AUTO |
| 30233Y1 | ICD-10 | Transfusion of Nonautologous Hematopoietic Stem Cells into Peripheral Vein, Percutaneous Approach | ALLO |
| 30233Y2 | ICD-10 | Transfusion of Allogeneic Related Hematopoietic Stem Cells into Peripheral Vein, Percutaneous Approach | ALLO |
| 30233Y3 | ICD-10 | Transfusion of Allogeneic Unrelated Hematopoietic Stem Cells into Peripheral Vein, Percutaneous Approach | ALLO |
| 30233Y4 | ICD-10 | Transfusion of Allogeneic Unspecified Hematopoietic Stem Cells into Peripheral Vein, Percutaneous Approach | ALLO |
| 30240G0 | ICD-10 | Transfusion of Autologous Bone Marrow into Central Vein, Open Approach | AUTO |
| 30240G1 | ICD-10 | Transfusion of Nonautologous Bone Marrow into Central Vein, Open Approach | ALLO |
| 30240Y0 | ICD-10 | Transfusion of Autologous Hematopoietic Stem Cells into Central Vein, Open Approach | AUTO |
| 30240Y1 | ICD-10 | Transfusion of Nonautologous Hematopoietic Stem Cells into Central Vein, Open Approach | ALLO |
| 30240Y2 | ICD-10 | Transfusion of Allogeneic Related Hematopoietic Stem Cells into Central Vein, Open Approach | ALLO |
| 30240Y3 | ICD-10 | Transfusion of Allogeneic Unrelated Hematopoietic Stem Cells into Central Vein, Open Approach | ALLO |
| 30240Y4 | ICD-10 | Transfusion of Allogeneic Unspecified Hematopoietic Stem Cells into Central Vein, Open Approach | ALLO |
| 30243G0 | ICD-10 | Transfusion of Autologous Bone Marrow into Central Vein, Percutaneous Approach | AUTO |
| 30243G1 | ICD-10 | Transfusion of Nonautologous Bone Marrow into Central Vein, Percutaneous Approach | ALLO |
| 30243Y0 | ICD-10 | Transfusion of Autologous Hematopoietic Stem Cells into Central Vein, Percutaneous Approach | AUTO |
| 30243Y1 | ICD-10 | Transfusion of Nonautologous Hematopoietic Stem Cells into Central Vein, Percutaneous Approach | ALLO |
| 30243Y2 | ICD-10 | Transfusion of Allogeneic Related Hematopoietic Stem Cells into Central Vein, Percutaneous Approach | ALLO |
| 30243Y3 | ICD-10 | Transfusion of Allogeneic Unrelated Hematopoietic Stem Cells into Central Vein, Percutaneous Approach | ALLO |
| 30243Y4 | ICD-10 | Transfusion of Allogeneic Unspecified Hematopoietic Stem Cells into Central Vein, Percutaneous Approach | ALLO |
| 30250G0 | ICD-10 | Transfusion of Autologous Bone Marrow into Peripheral Artery, Open Approach | AUTO |
| 30250G1 | ICD-10 | Transfusion of Nonautologous Bone Marrow into Peripheral Artery, Open Approach | ALLO |
| 30250Y0 | ICD-10 | Transfusion of Autologous Hematopoietic Stem Cells into Peripheral Artery, Open Approach | AUTO |
| 30250Y1 | ICD-10 | Transfusion of Nonautologous Hematopoietic Stem Cells into Peripheral Artery, Open Approach | ALLO |
| 30253G0 | ICD-10 | Transfusion of Autologous Bone Marrow into Peripheral Artery, Percutaneous Approach | AUTO |
| 30253G1 | ICD-10 | Transfusion of Nonautologous Bone Marrow into Peripheral Artery, Percutaneous Approach | ALLO |
| 30253Y0 | ICD-10 | Transfusion of Autologous Hematopoietic Stem Cells into Peripheral Artery, Percutaneous Approach | AUTO |
| 30253Y1 | ICD-10 | Transfusion of Nonautologous Hematopoietic Stem Cells into Peripheral Artery, Percutaneous Approach | ALLO |
| 30260G0 | ICD-10 | Transfusion of Autologous Bone Marrow into Central Artery, Open Approach | AUTO |
| 30260G1 | ICD-10 | Transfusion of Nonautologous Bone Marrow into Central Artery, Open Approach | ALLO |
| 30260Y0 | ICD-10 | Transfusion of Autologous Hematopoietic Stem Cells into Central Artery, Open Approach | AUTO |
| 30260Y1 | ICD-10 | Transfusion of Nonautologous Hematopoietic Stem Cells into Central Artery, Open Approach | ALLO |
| 30263G0 | ICD-10 | Transfusion of Autologous Bone Marrow into Central Artery, Percutaneous Approach | AUTO |
| 30263G1 | ICD-10 | Transfusion of Nonautologous Bone Marrow into Central Artery, Percutaneous Approach | ALLO |
| 30263Y0 | ICD-10 | Transfusion of Autologous Hematopoietic Stem Cells into Central Artery, Percutaneous Approach | AUTO |
| 30263Y1 | ICD-10 | Transfusion of Nonautologous Hematopoietic Stem Cells into Central Artery, Percutaneous Approach | ALLO |
| 4101 | ICD-9 | Autologous bone marrow transplant without purging | AUTO |
| 4102 | ICD-9 | Allogeneic bone marrow transplant with purging | ALLO |
| 4103 | ICD-9 | Allogeneic bone marrow transplant without purging | ALLO |
| 4104 | ICD-9 | Autologous hematopoietic stem cell transplant without purging | AUTO |
| 4105 | ICD-9 | Allogeneic hematopoietic stem cell transpant without purging | ALLO |
| 4107 | ICD-9 | Autologous hematopoietic stem cell transplant with purging | AUTO |
| 4108 | ICD-9 | Allogeneic hematopoietic stem cell transplant with purging | ALLO |
| 4109 | ICD-9 | Autologous bone marrow transplant with purging | AUTO |

**Table 3. LBCL-Related HRU**

|  |  |  | **ASCT-Intended** | |
| --- | --- | --- | --- | --- |
|  |  |  | **Non-SCT** | **SCT** |
| **Measure** | | | (N=801) | (N=244) |
| **Duration of Observation Period** | | | | |
|  | ***Days from Second LOT to End of Study Period*** | | |  |
|  |  | Mean [SD] | 386.2 [417.6] | 696.8 [502.3] |
|  |  | Median | 235.0 | 564.5 |
| **Hospitalization** | | |  |  |
|  | ***Prevalence*** | |  |  |
|  |  | N (%) | 428 (53.4) | 221 (90.6) |
|  | ***Bed Days*** | |  |  |
|  |  | P1000PPM | 488.5 | 1068.4 |
|  | ***LOS (Utilizers)*** | |  |  |
|  |  | Mean [SD] | 6.6 [5.2] | 15.9 [7.8] |
|  |  | Median | 5.0 | 16.0 |
| **Emergency Department** | | |  |  |
|  | ***Prevalence*** | |  |  |
|  |  | N (%) | 230 (28.7) | 59 (24.2) |
|  | ***No. of Visits*** | |  |  |
|  |  | P1000PPM | 35.4 | 15.2 |
| **Outpatient** | | |  |  |
|  | ***Prevalence*** | |  |  |
|  |  | N (%) | 801 (100) | 244 (100) |
|  | ***No. of Visits*** | |  |  |
|  |  | P1000PPM | 2098.9 | 2072.7 |
| **Skilled Nursing Facility** | | |  |  |
|  | ***Prevalence*** | |  |  |
|  |  | N (%) | 66 (8.2) | 18 (7.4) |
|  | ***Bed Days*** | |  |  |
|  |  | P1000PPM | 162.7 | 54.2 |
|  | ***LOS (Utilizers)*** | |  |  |
|  |  | Mean [SD] | 17.1 [11.5] | 12.1 [7.6] |
|  |  | Median | 14.5 | 11.5 |
| **Home Health** | | |  |  |
|  | ***Prevalence*** | | 151 (18.9) | 48 (19.7) |
|  |  | N (%) |  |  |
|  | ***No. of Visits*** | |  |  |
|  |  | P1000PPM | 246.5 | 190.2 |
| **Hospice** | | |  |  |
|  | ***Prevalence*** | |  |  |
|  |  | N (%) | 222 (27.7) | 32 (13.1) |
|  | ***No. of Days*** | |  |  |
|  |  | P1000PPM | 555.9 | 80.5 |
| ASCT=autologous stem cell transplant; SCT=stem cell transplant | | | | |
| SD=standard deviation; P1000PPM=per 1000 patients per month | | | | |
| Prevalence=patients with at least 1 of the respective utilization categories | | | | |
| Bed Days=total number of days in the respective setting P1000PPM | | | | |
| LOS (Utilizers)=average length of stay for patients with at least 1 stay | | | | |

**Table 4. LBCL-Related Costs PPPM**

|  |  |  |  | **ASCT-Intended** | |
| --- | --- | --- | --- | --- | --- |
|  | | | | **Non-SCT** | **SCT** |
|  | | | | **(N=801)** | **(N=244)** |
| **Total Healthcare Costs: Sum of 1 and 2** | | | |  |  |
| **PPPM** | | | | $5,356 | $6,830 |
|  | **1. Total Medical (Parts A & B): Sum of 1a-1d** | | |  |  |
|  | **PPPM** | | | $5,141 | $6,636 |
|  |  | **1a. Inpatient Hospitalization** | |  |  |
|  |  | **PPPM** | | $1,301 | $3,833 |
|  |  | **1b. Emergency Department** | |  |  |
|  |  | **PPPM** | | $40 | $17 |
|  |  | **1c. Outpatient: 1c.1 + 1c.2** | |  |  |
|  |  | **PPPM** | | $3,499 | $2,690 |
|  |  | **1d. All Other Medical** | |  |  |
|  |  | **PPPM** | | $301 | $96 |
|  | **2. Total Part D Pharmaceuticals: (Part D Chemotherapy)** | | |  |  |
|  | **PPPM** | | | $215 | $194 |

**Table 5. Adverse Event Code Sets**

| **Code** | **Code Type** | **Full Description** |
| --- | --- | --- |
| **Thrombocytopenia** | | |
| 28730 | ICD-9 | Primary thrombocytopenia,unspecified |
| 28731 | ICD-9 | Immune thrombocytopenic purpura |
| 28739 | ICD-9 | Other primary thrombocytopenia |
| 28741 | ICD-9 | Posttransfusion purpura |
| 28749 | ICD-9 | Other secondary thrombocytopenia |
| 2875 | ICD-9 | Thrombocytopenia, unspecified |
| 4466 | ICD-9 | Thrombotic microangiopathy |
| D692 | ICD-10 | Other nonthrombocytopenic purpura |
| D693 | ICD-10 | Immune thrombocytopenic purpura |
| D6949 | ICD-10 | Other primary thrombocytopenia |
| D6951 | ICD-10 | Posttransfusion purpura |
| D6959 | ICD-10 | Other secondary thrombocytopenia |
| D696 | ICD-10 | Thrombocytopenia, unspecified |
| M311 | ICD-10 | Thrombotic microangiopathy |
| **Leukopenia** | | |
| 28850 | ICD-9 | Leukocytopenia, unspecified |
| 28851 | ICD-9 | Lymphocytopenia |
| 28859 | ICD-9 | Other decreased white blood cell count |
| D72819 | ICD-10 | Decreased white blood cell count, unspecified |
| D72810 | ICD-10 | Lymphocytopenia |
| D72818 | ICD-10 | Other decreased white blood cell count |
| **Anemia** | | |
| 2853 | ICD-9 | Antineoplastic chemotherapy induced anemia |
| 2850 | ICD-9 | Sideroblastic anemia |
| 2858 | ICD-9 | Other specified anemias |
| 2859 | ICD-9 | Anemia, unspecified |
| D641 | ICD-10 | Secondary sideroblastic anemia due to disease |
| D642 | ICD-10 | Secondary sideroblastic anemia due to drugs and toxins |
| D643 | ICD-10 | Other sideroblastic anemias |
| D6481 | ICD-10 | Anemia due to antineoplastic chemotherapy |
| D6489 | ICD-10 | Other specified anemias |
| D649 | ICD-10 | Anemia, unspecified |
| **Febrile Neutropenia** | | |
| Inpatient (IP): Diagnosis (dx) of neutropenia in any position AND (IP dx of fever OR IP dx of infection in any position) | | |
| Outpatient (OP): dx of neutropenia AND (OP dx of fever OR (OP dx of infection AND Rx for antimicrobials) | | |
| 28800 | ICD-9 | Neutropenia, unspecified |
| 28802 | ICD-9 | Cyclic neutropenia |
| 28803 | ICD-9 | Drug induced neutropenia |
| 28804 | ICD-9 | Neutropenia due to infection |
| 28809 | ICD-9 | Other neutropenia |
| D701 | ICD-10 | Agranulocytosis secondary to cancer chemotherapy |
| D702 | ICD-10 | Other drug-induced agranulocytosis |
| D703 | ICD-10 | Neutropenia due to infection |
| D704 | ICD-10 | Cyclic neutropenia |
| D708 | ICD-10 | Other neutropenia |
| D709 | ICD-10 | Neutropenia, unspecified |
| 7806 | ICD-9 | Fever and other physiologic disturbances of temperature regulation |
| 78060 | ICD-9 | Fever, unspecified |
| 78062 | ICD-9 | Postprocedural fever |
| 78063 | ICD-9 | Postvaccination fever |
| 78066 | ICD-9 | Febrile nonhemolytic transfusion reaction |
| 78061 | ICD-9 | Fever presenting with conditions classified elsewhere |
| R502 | ICD-10 | Drug induced fever |
| R5081 | ICD-10 | Fever presenting with conditions classified elsewhere |
| R5082 | ICD-10 | Postprocedural fever |
| R5083 | ICD-10 | Postvaccination fever |
| R5084 | ICD-10 | Febrile nonhemolytic transfusion reaction |
| R509 | ICD-10 | Fever, unspecified |
| R509 | ICD-10 | Fever, unspecified |
| **Infections** | | |
| 002 | ICD-9 | typhoid and paratyphoid fevers |
| 0020 | ICD-9 | typhoid fever |
| 0021 | ICD-9 | paratyphoid fever a |
| 0022 | ICD-9 | paratyphoid fever b |
| 0023 | ICD-9 | paratyphoid fever c |
| 0029 | ICD-9 | paratyphoid fever, unspecified |
| 0030 | ICD-9 | salmonella gastroenteritis |
| 0031 | ICD-9 | salmonella septicemia |
| 0032 | ICD-9 | localized salmonella infections |
| 00320 | ICD-9 | localized salmonella infection, unspecified |
| 00321 | ICD-9 | salmonella meningitis |
| 00322 | ICD-9 | salmonella pneumonia |
| 00323 | ICD-9 | salmonella arthritis |
| 00324 | ICD-9 | salmonella osteomyelitis |
| 00329 | ICD-9 | other localized salmonella infections |
| 0038 | ICD-9 | other specified salmonella infections |
| 0039 | ICD-9 | salmonella infection, unspecified |
| 004 | ICD-9 | shigella |
| 0040 | ICD-9 | shigella dysenteriae |
| 0041 | ICD-9 | shigella flexneri |
| 0042 | ICD-9 | shigella boydii |
| 0043 | ICD-9 | shigella sonnei |
| 0048 | ICD-9 | other specified shigella infections |
| 0049 | ICD-9 | shigellosis, unspecified |
| 008 | ICD-9 | intestinal infection due to other organisms |
| 0080 | ICD-9 | intestinal infection due to escherichia coli [e coli] |
| 00800 | ICD-9 | intestinal infection due to e coli, unspecified |
| 00801 | ICD-9 | intestinal infection due to enteropathogenic e coli |
| 00802 | ICD-9 | intestinal infection due to enterotoxigenic e coli |
| 00803 | ICD-9 | intestinal infection due to enteroinvasive e coli |
| 00804 | ICD-9 | intestinal infection due to enterohemorrhagic e coli |
| 00809 | ICD-9 | intestinal infection due to other intestinal e coli infections |
| 0081 | ICD-9 | intestinal infection due to arizona group of paracolon bacilli |
| 0082 | ICD-9 | intestinal infection due to aerobacter aerogenes |
| 0083 | ICD-9 | intestinal infection due to proteus (mirabilis) (morganii) |
| 0084 | ICD-9 | intestinal infection due to other specified bacteria |
| 00841 | ICD-9 | intestinal infection due to staphylococcus |
| 00842 | ICD-9 | intestinal infection due to pseudomonas |
| 00843 | ICD-9 | intestinal infection due to campylobacter |
| 00844 | ICD-9 | intestinal infection due to yersinia enterocolitica |
| 00845 | ICD-9 | intestinal infection due to clostridium difficile |
| 00846 | ICD-9 | intestinal infection due to other anaerobes |
| 00847 | ICD-9 | intestinal infection due to other gram-negative bacteria |
| 00849 | ICD-9 | intestinal infection due to other organisms |
| 0085 | ICD-9 | bacterial enteritis, unspecified |
| 0086 | ICD-9 | enteritis due to specified virus |
| 00861 | ICD-9 | enteritis due to rotavirus |
| 00862 | ICD-9 | enteritis due to adenovirus |
| 00863 | ICD-9 | enteritis due to norwalk virus |
| 00864 | ICD-9 | enteritis due to other small round viruses [srv s] |
| 00865 | ICD-9 | enteritis due to calicivirus |
| 00866 | ICD-9 | enteritis due to astrovirus |
| 00867 | ICD-9 | enteritis due to enterovirus not elsewhere classified |
| 00869 | ICD-9 | enteritis due to other viral enteritis |
| 0088 | ICD-9 | intestinal infection due to other organism, not elsewhere classified |
| 034 | ICD-9 | streptococcal sore throat and scarlet fever |
| 0340 | ICD-9 | streptococcal sore throat |
| 0341 | ICD-9 | scarlet fever |
| 035 | ICD-9 | erysipelas |
| 0360 | ICD-9 | meningococcal meningitis |
| 036 | ICD-9 | meningococcal infection |
| 0360 | ICD-9 | meningococcal meningitis |
| 0361 | ICD-9 | meningococcal encephalitis |
| 0362 | ICD-9 | meningococcemia |
| 0363 | ICD-9 | waterhouse-friderichsen syndrome, meningococcal |
| 0364 | ICD-9 | meningococcal carditis |
| 03640 | ICD-9 | meningococcal carditis, unspecified |
| 03641 | ICD-9 | meningococcal pericarditis |
| 03642 | ICD-9 | meningococcal endocarditis |
| 03643 | ICD-9 | meningococcal myocarditis |
| 0368 | ICD-9 | other specified meningococcal infections |
| 03681 | ICD-9 | meningococcal optic neuritis |
| 03682 | ICD-9 | meningococcal arthropathy |
| 03689 | ICD-9 | other specified meningococcal infections |
| 039 | ICD-9 | actinomycotic infections |
| 0390 | ICD-9 | cutaneous actinomycotic infection |
| 0391 | ICD-9 | pulmonary actinomycotic infection |
| 0392 | ICD-9 | abdominal actinomycotic infection |
| 0393 | ICD-9 | cervicofacial actinomycotic infection |
| 0394 | ICD-9 | madura foot |
| 0398 | ICD-9 | actinomycotic infection of other specified sites |
| 0399 | ICD-9 | actinomycotic infection of unspecified site |
| 040 | ICD-9 | other bacterial diseases |
| 0400 | ICD-9 | gas gangrene |
| 0401 | ICD-9 | rhinoscleroma |
| 0402 | ICD-9 | whipple s disease |
| 0403 | ICD-9 | necrobacillosis |
| 0404 | ICD-9 | other specified botulism |
| 04041 | ICD-9 | infant botulism |
| 04042 | ICD-9 | wound botulism |
| 0408 | ICD-9 | other specified bacterial diseases |
| 04081 | ICD-9 | tropical pyomyositis |
| 04082 | ICD-9 | toxic shock syndrome |
| 04089 | ICD-9 | other specified bacterial diseases |
| 041 | ICD-9 | bacterial infection in conditions classified elsewhere and of unspecified site |
| 04112 | ICD-9 | methicillin resistant staphylococcus aureus in conditions classified elsewhere and of unspecified site |
| 04119 | ICD-9 | staphylococcus infection in conditions classified elsewhere and of unspecified site, other staphylococcus |
| 0412 | ICD-9 | pneumococcus infection in conditions classified elsewhere and of unspecified site |
| 0413 | ICD-9 | friedlã¤nder s bacillus infection in conditions classified elsewhere and of unspecified site |
| 0414 | ICD-9 | escherichia coli [e coli] infection in conditions classified elsewhere and of unspecified site |
| 04141 | ICD-9 | shiga toxin-producing escherichia coli [e coli] (stec) o157 |
| 04142 | ICD-9 | other specified shiga toxin-producing escherichia coli [e coli] (stec) |
| 04143 | ICD-9 | shiga toxin-producing escherichia coli [e coli] (stec), unspecified |
| 04149 | ICD-9 | other and unspecified escherichia coli [e coli] |
| 0415 | ICD-9 | hemophilus influenzae [h influenzae] infection in conditions classified elsewhere and of unspecified site |
| 0416 | ICD-9 | proteus (mirabilis) (morganii) infection in conditions classified elsewhere and of unspecified site |
| 0417 | ICD-9 | pseudomonas infection in conditions classified elsewhere and of unspecified site |
| 0418 | ICD-9 | other specified bacterial infection in other conditions and of unspecified site |
| 04181 | ICD-9 | other specified bacterial infections in conditions classified elsewhere and of unspecified site, mycoplasma |
| 04182 | ICD-9 | bacteroides fragilis |
| 04183 | ICD-9 | other specified bacterial infections in conditions classified elsewhere and of unspecified site, clostridium perfringens |
| 04184 | ICD-9 | other specified bacterial infections in conditions classified elsewhere and of unspecified site, other anaerobes |
| 04185 | ICD-9 | other specified bacterial infections in conditions classified elsewhere and of unspecified site, other gram-negative organisms |
| 04186 | ICD-9 | helicobacter pylori [h pylori] |
| 04189 | ICD-9 | other specified bacterial infections in conditions classified elsewhere and of unspecified site, other specified bacteria |
| 0419 | ICD-9 | bacterial infection, unspecified, in conditions classified elsewhere and of unspecified site |
| 101 | ICD-9 | vincent s angina |
| 1128 | ICD-9 | candidiasis of other specified sites |
| 11281 | ICD-9 | candidal endocarditis |
| 11282 | ICD-9 | candidal otitis externa |
| 11283 | ICD-9 | candidal meningitis |
| 11284 | ICD-9 | candidal esophagitis |
| 11285 | ICD-9 | candidal enteritis |
| 114 | ICD-9 | coccidioidomycosis |
| 1141 | ICD-9 | Primary extrapulmonary coccidioidomycosis |
| 1142 | ICD-9 | Coccidioidal meningitis |
| 1143 | ICD-9 | Other forms of progressive coccidioidomycosis |
| 1144 | ICD-9 | Chronic pulmonary coccidioidomycosis |
| 1145 | ICD-9 | Pulmonary coccidioidomycosis, unspecified |
| 1149 | ICD-9 | Coccidioidomycosis, unspecified |
| 115 | ICD-9 | Infection by Histoplasma capsulatum, without mention of manifestation |
| 11501 | ICD-9 | Infection by Histoplasma capsulatum, meningitis |
| 11502 | ICD-9 | Infection by Histoplasma capsulatum, retinitis |
| 11503 | ICD-9 | Infection by Histoplasma capsulatum, pericarditis |
| 11504 | ICD-9 | Infection by Histoplasma capsulatum, endocarditis |
| 11509 | ICD-9 | Infection by Histoplasma capsulatum, other |
| 1151 | ICD-9 | Infection by Histoplasma duboisii, without mention of manifestation |
| 11511 | ICD-9 | Infection by Histoplasma duboisii, meningitis |
| 11512 | ICD-9 | Infection by Histoplasma duboisii, retinitis |
| 11513 | ICD-9 | Infection by Histoplasma duboisii, pericarditis |
| 11514 | ICD-9 | Infection by Histoplasma duboisii, endocarditis |
| 11519 | ICD-9 | Infection by Histoplasma duboisii, other |
| 1159 | ICD-9 | Histoplasmosis, unspecified, without mention of manifestation |
| 11591 | ICD-9 | Histoplasmosis, unspecified, meningitis |
| 11592 | ICD-9 | Histoplasmosis, unspecified, retinitis |
| 11593 | ICD-9 | Histoplasmosis, unspecified, pericarditis |
| 11594 | ICD-9 | Histoplasmosis, unspecified, endocarditis |
| 11599 | ICD-9 | Histoplasmosis, unspecified, other |
| 116 | ICD-9 | blastomycotic infection |
| 1160 | ICD-9 | blastomycosis |
| 1161 | ICD-9 | paracoccidioidomycosis |
| 1162 | ICD-9 | lobomycosis |
| 1170 | ICD-9 | rhinosporidiosis |
| 1171 | ICD-9 | sporotrichosis |
| 1172 | ICD-9 | chromoblastomycosis |
| 1173 | ICD-9 | aspergillosis |
| 1174 | ICD-9 | mycotic mycetomas |
| 1175 | ICD-9 | cryptococcosis |
| 1176 | ICD-9 | allescheriosis [petriellidosis] |
| 1177 | ICD-9 | zygomycosis [phycomycosis or mucormycosis] |
| 1178 | ICD-9 | infection by dematiacious fungi [phaehyphomycosis] |
| 1179 | ICD-9 | other and unspecified mycoses |
| 118 | ICD-9 | opportunistic mycoses |
| 320 | ICD-9 | bacterial meningitis |
| 3200 | ICD-9 | hemophilus meningitis |
| 3201 | ICD-9 | pneumococcal meningitis |
| 3202 | ICD-9 | streptococcal meningitis |
| 3203 | ICD-9 | staphylococcal meningitis |
| 3207 | ICD-9 | meningitis in other bacterial diseases classified elsewhere |
| 3208 | ICD-9 | meningitis due to other specified bacteria |
| 32081 | ICD-9 | anaerobic meningitis |
| 32082 | ICD-9 | meningitis due to gram-negative bacteria, not elsewhere classified |
| 32089 | ICD-9 | meningitis due to other specified bacteria |
| 3209 | ICD-9 | meningitis due to unspecified bacterium |
| 321 | ICD-9 | meningitis due to other organisms |
| 3210 | ICD-9 | cryptococcal meningitis |
| 3211 | ICD-9 | meningitis in other fungal diseases |
| 3212 | ICD-9 | meningitis due to viruses not elsewhere classified |
| 3213 | ICD-9 | meningitis due to trypanosomiasis |
| 3214 | ICD-9 | meningitis in sarcoidosis |
| 3218 | ICD-9 | meningitis due to other nonbacterial organisms classified elsewhere |
| 324 | ICD-9 | intracranial and intraspinal abscess |
| 3240 | ICD-9 | intracranial abscess |
| 3241 | ICD-9 | intraspinal abscess |
| 3249 | ICD-9 | intracranial and intraspinal abscess of unspecified site |
| 3600 | ICD-9 | purulent endophthalmitis |
| 36000 | ICD-9 | purulent endophthalmitis, unspecified |
| 36001 | ICD-9 | acute endophthalmitis |
| 36002 | ICD-9 | panophthalmitis |
| 36003 | ICD-9 | chronic endophthalmitis |
| 36004 | ICD-9 | vitreous abscess |
| 3801 | ICD-9 | infective otitis externa |
| 38010 | ICD-9 | infective otitis externa, unspecified |
| 38011 | ICD-9 | acute infection of pinna |
| 38012 | ICD-9 | acute swimmers ear |
| 38013 | ICD-9 | other acute infections of external ear |
| 38014 | ICD-9 | malignant otitis externa |
| 38015 | ICD-9 | chronic mycotic otitis externa |
| 38016 | ICD-9 | other chronic infective otitis externa |
| 3802 | ICD-9 | other otitis externa |
| 38022 | ICD-9 | other acute otitis externa |
| 38023 | ICD-9 | other chronic otitis externa |
| 3830 | ICD-9 | acute mastoiditis |
| 38300 | ICD-9 | acute mastoiditis without complications |
| 38301 | ICD-9 | subperiosteal abscess of mastoid |
| 38302 | ICD-9 | acute mastoiditis with other complications |
| 3831 | ICD-9 | chronic mastoiditis |
| 3832 | ICD-9 | petrositis |
| 38320 | ICD-9 | petrositis, unspecified |
| 38321 | ICD-9 | acute petrositis |
| 38322 | ICD-9 | chronic petrositis |
| 376 | ICD-9 | acute inflammation of orbit |
| 3760 | ICD-9 | acute inflammation of orbit |
| 37600 | ICD-9 | acute inflammation of orbit |
| 42099 | ICD-9 | acute pericarditis |
| 421 | ICD-9 | acute and subacute endocarditis |
| 4210 | ICD-9 | acute and subacute bacterial endocarditis |
| 4211 | ICD-9 | acute and subacute infective endocarditis in diseases classified elsewhere |
| 461 | ICD-9 | acute sinusitis |
| 4610 | ICD-9 | acute maxillary sinusitis |
| 4611 | ICD-9 | acute frontal sinusitis |
| 4612 | ICD-9 | acute ethmoidal sinusitis |
| 4613 | ICD-9 | acute sphenoidal sinusitis |
| 4618 | ICD-9 | other acute sinusitis |
| 4619 | ICD-9 | acute sinusitis, unspecified |
| 462 | ICD-9 | acute pharyngitis |
| 463 | ICD-9 | acute tonsilitis |
| 475 | ICD-9 | peritonsillar abscess |
| 481 | ICD-9 | pneumonococcal pneumonia |
| 4820 | ICD-9 | pneumonia due to klebsiella pneumoniae |
| 4821 | ICD-9 | pneumonia due to pseudomonas |
| 4822 | ICD-9 | pneumonia due to hemophilus influenzae [h influenzae] |
| 4823 | ICD-9 | pneumonia due to streptococcus |
| 48230 | ICD-9 | pneumonia due to streptococcus, unspecified |
| 48231 | ICD-9 | pneumonia due to streptococcus, group a |
| 48232 | ICD-9 | pneumonia due to streptococcus, group b |
| 48239 | ICD-9 | pneumonia due to other streptococcus |
| 4824 | ICD-9 | pneumonia due to staphylococcus |
| 48240 | ICD-9 | pneumonia due to staphylococcus, unspecified |
| 48241 | ICD-9 | methicillin susceptible pneumonia due to staphylococcus aureus |
| 48242 | ICD-9 | methicillin resistant pneumonia due to staphylococcus aureus |
| 48249 | ICD-9 | other staphylococcus pneumonia |
| 4828 | ICD-9 | pneumonia due to other specified bacteria |
| 48281 | ICD-9 | pneumonia due to anaerobes |
| 48282 | ICD-9 | pneumonia due to escherichia coli [e coli] |
| 48283 | ICD-9 | pneumonia due to other gram-negative bacteria |
| 48284 | ICD-9 | pneumonia due to legionnaires disease |
| 48289 | ICD-9 | pneumonia due to other specified bacteria |
| 485 | ICD-9 | bronchopneumonia |
| 486 | ICD-9 | pneumonia, organism unspec |
| 49121 | ICD-9 | acute exacerbation of chronic bronchitis |
| 494 | ICD-9 | bronchiectasis |
| 4940 | ICD-9 | bronchiectasis |
| 4941 | ICD-9 | bronchiectasis |
| 510 | ICD-9 | empyema |
| 5100 | ICD-9 | empyema with fistula |
| 5109 | ICD-9 | empyema without mention of fistula |
| 513 | ICD-9 | abscess of lung and mediastinum |
| 5130 | ICD-9 | abscess of lung |
| 5131 | ICD-9 | abscess of mediastinum |
| 5225 | ICD-9 | periapical abscess without sinus |
| 5227 | ICD-9 | periapical abscess with sinus |
| 5264 | ICD-9 | inflammatory conditions of jaw |
| 5273 | ICD-9 | abscess of salivary gland |
| 5283 | ICD-9 | cellulitis and abscess of soft tissue |
| 540 | ICD-9 | acute appendicitis |
| 5400 | ICD-9 | acute appendicitis with generalized peritonitis |
| 5401 | ICD-9 | acute appendicitis with peritoneal abscess |
| 5409 | ICD-9 | acute appendicitis without mention of peritonitis |
| 541 | ICD-9 | appendicitis |
| 542 | ICD-9 | other appendicitis |
| 56201 | ICD-9 | diverticulitis of small intestine (without mention of hemorrhage) |
| 56203 | ICD-9 | diverticulitis of small intestine with hemorrhage |
| 56211 | ICD-9 | diverticulitis of colon (without mention of hemorrhage) |
| 56213 | ICD-9 | diverticulitis of colon with hemorrhage |
| 566 | ICD-9 | abscess of anal and rectal regions |
| 5670 | ICD-9 | peritonitis in infectious diseases classified elsewhere |
| 5671 | ICD-9 | pneumococcal peritonitis |
| 5672 | ICD-9 | other suppurative peritonitis |
| 56721 | ICD-9 | peritonitis (acute) generalized |
| 56722 | ICD-9 | peritoneal abscess |
| 56723 | ICD-9 | spontaneous bacterial peritonitis |
| 56729 | ICD-9 | other suppurative peritonitis |
| 5673 | ICD-9 | retroperitoneal infections |
| 56731 | ICD-9 | psoas muscle abscess |
| 56738 | ICD-9 | other retroperitoneal abscess |
| 56739 | ICD-9 | other retroperitoneal infections |
| 5678 | ICD-9 | other specified peritonitis |
| 56781 | ICD-9 | choleperitonitis |
| 56782 | ICD-9 | sclerosing mesenteritis |
| 56789 | ICD-9 | other specified peritonitis |
| 5679 | ICD-9 | unspecified peritonitis |
| 5750 | ICD-9 | acute cholecystitis |
| 5751 | ICD-9 | other cholecystitis |
| 57510 | ICD-9 | cholecystitis, unspecified |
| 57511 | ICD-9 | chronic cholecystitis |
| 57512 | ICD-9 | acute and chronic cholecystitis |
| 5900 | ICD-9 | chronic pyelonephritis |
| 59000 | ICD-9 | chronic pyelonephritis without lesion of renal medullary necrosis |
| 59001 | ICD-9 | chronic pyelonephritis with lesion of renal medullary necrosis |
| 5901 | ICD-9 | acute pyelonephritis |
| 59010 | ICD-9 | acute pyelonephritis without lesion of renal medullary necrosis |
| 59011 | ICD-9 | acute pyelonephritis with lesion of renal medullary necrosis |
| 5902 | ICD-9 | renal and perinephric abscess |
| 5903 | ICD-9 | pyeloureteritis cystica |
| 5908 | ICD-9 | other pyelonephritis or pyonephrosis, not specified as acute or chronic |
| 59080 | ICD-9 | pyelonephritis, unspecified |
| 59081 | ICD-9 | pyelitis or pyelonephritis in diseases classified elsewhere |
| 5909 | ICD-9 | infection of kidney, unspecified |
| 5990 | ICD-9 | urinary tract infection |
| 601 | ICD-9 | inflammatory diseases of prostate |
| 6010 | ICD-9 | acute prostatitis |
| 6011 | ICD-9 | chronic prostatitis |
| 6012 | ICD-9 | abscess of prostate |
| 6751 | ICD-9 | abscess of breast associated with childbirth |
| 67510 | ICD-9 | abscess of breast associated with childbirth, unspecified as to episode of care or not applicable |
| 67511 | ICD-9 | abscess of breast associated with childbirth, delivered, with or without mention of antepartum condition |
| 67512 | ICD-9 | abscess of breast associated with childbirth, delivered, with mention of postpartum complication |
| 67513 | ICD-9 | abscess of breast associated with childbirth, antepartum condition or complication |
| 67514 | ICD-9 | abscess of breast associated with childbirth, postpartum condition or complication |
| 680 | ICD-9 | carbuncle and furuncle |
| 6800 | ICD-9 | carbuncle and furuncle of face |
| 6801 | ICD-9 | carbuncle and furuncle of neck |
| 6802 | ICD-9 | carbuncle and furuncle of trunk |
| 6803 | ICD-9 | carbuncle and furuncle of upper arm and forearm |
| 6804 | ICD-9 | carbuncle and furuncle of hand |
| 6805 | ICD-9 | carbuncle and furuncle of buttock |
| 6806 | ICD-9 | carbuncle and furuncle of leg, except foot |
| 6807 | ICD-9 | carbuncle and furuncle of foot |
| 6808 | ICD-9 | carbuncle and furuncle of other specified sites |
| 6809 | ICD-9 | carbuncle and furuncle of unspecified site |
| 681 | ICD-9 | cellulitis finger/toe |
| 6810 | ICD-9 | cellulitis and abscess of finger |
| 68100 | ICD-9 | cellulitis and abscess of finger, unspecified |
| 6811 | ICD-9 | cellulitis and abscess of toe |
| 68110 | ICD-9 | cellulitis and abscess of toe, unspecified |
| 682 | ICD-9 | other cellulitis and abscess |
| 6820 | ICD-9 | cellulitis and abscess of face |
| 6821 | ICD-9 | cellulitis and abscess of neck |
| 6822 | ICD-9 | cellulitis and abscess of trunk |
| 6823 | ICD-9 | cellulitis and abscess of upper arm and forearm |
| 6824 | ICD-9 | cellulitis and abscess of hand, except fingers and thumb |
| 6825 | ICD-9 | cellulitis and abscess of buttock |
| 6826 | ICD-9 | cellulitis and abscess of leg, except foot |
| 6827 | ICD-9 | cellulitis and abscess of foot, except toes |
| 6828 | ICD-9 | cellulitis and abscess of other specified sites |
| 6829 | ICD-9 | cellulitis and abscess of unspecified sites |
| 683 | ICD-9 | acute lymphadenitis |
| 6850 | ICD-9 | pilonidal cyst with abscess |
| 686 | ICD-9 | pyoderma |
| 6860 | ICD-9 | pyoderma |
| 68600 | ICD-9 | pyoderma, unspecified |
| 68601 | ICD-9 | pyoderma gangrenosum |
| 68609 | ICD-9 | other pyoderma |
| 6861 | ICD-9 | pyogenic granuloma of skin and subcutaneous tissue |
| 6868 | ICD-9 | other specified local infections of skin and subcutaneous tissue |
| 6869 | ICD-9 | unspecified local infection of skin and subcutaneous tissue |
| 711 | ICD-9 | arthropathy associated with infections |
| 7110 | ICD-9 | pyogenic arthritis |
| 71100 | ICD-9 | pyogenic arthritis, site unspecified |
| 71101 | ICD-9 | pyogenic arthritis, shoulder region |
| 71102 | ICD-9 | pyogenic arthritis, upper arm |
| 71103 | ICD-9 | pyogenic arthritis, forearm |
| 71104 | ICD-9 | pyogenic arthritis, hand |
| 71105 | ICD-9 | pyogenic arthritis, pelvic region and thigh |
| 71106 | ICD-9 | pyogenic arthritis, lower leg |
| 71107 | ICD-9 | pyogenic arthritis, ankle and foot |
| 71108 | ICD-9 | pyogenic arthritis, other specified sites |
| 71109 | ICD-9 | pyogenic arthritis, multiple sites |
| 72886 | ICD-9 | necrotizing facsitis |
| 730 | ICD-9 | osteomyelitis |
| 7300 | ICD-9 | acute osteomyelitis |
| 73000 | ICD-9 | acute osteomyelitis, site unspecified |
| 73001 | ICD-9 | acute osteomyelitis, shoulder region |
| 73002 | ICD-9 | acute osteomyelitis, upper arm |
| 73003 | ICD-9 | acute osteomyelitis, forearm |
| 73004 | ICD-9 | acute osteomyelitis, hand |
| 73005 | ICD-9 | acute osteomyelitis, pelvic region and thigh |
| 73006 | ICD-9 | acute osteomyelitis, lower leg |
| 73007 | ICD-9 | acute osteomyelitis, ankle and foot |
| 73008 | ICD-9 | acute osteomyelitis, other specified sites |
| 73009 | ICD-9 | acute osteomyelitis, multiple sites |
| 7301 | ICD-9 | chronic osteomyelitis |
| 73010 | ICD-9 | chronic osteomyelitis, site unspecified |
| 73011 | ICD-9 | chronic osteomyelitis, shoulder region |
| 73012 | ICD-9 | chronic osteomyelitis, upper arm |
| 73013 | ICD-9 | chronic osteomyelitis, forearm |
| 73014 | ICD-9 | chronic osteomyelitis, hand |
| 73015 | ICD-9 | chronic osteomyelitis, pelvic region and thigh |
| 73016 | ICD-9 | chronic osteomyelitis, lower leg |
| 73017 | ICD-9 | chronic osteomyelitis, ankle and foot |
| 73018 | ICD-9 | chronic osteomyelitis, other specified sites |
| 73019 | ICD-9 | chronic osteomyelitis, multiple sites |
| 7302 | ICD-9 | unspecified osteomyelitis |
| 73020 | ICD-9 | unspecified osteomyelitis, site unspecified |
| 73021 | ICD-9 | unspecified osteomyelitis, shoulder region |
| 73022 | ICD-9 | unspecified osteomyelitis, upper arm |
| 73023 | ICD-9 | unspecified osteomyelitis, forearm |
| 73024 | ICD-9 | unspecified osteomyelitis, hand |
| 73025 | ICD-9 | unspecified osteomyelitis, pelvic region and thigh |
| 73026 | ICD-9 | unspecified osteomyelitis, lower leg |
| 73027 | ICD-9 | unspecified osteomyelitis, ankle and foot |
| 73028 | ICD-9 | unspecified osteomyelitis, other specified sites |
| 73029 | ICD-9 | unspecified osteomyelitis, multiple sites |
| 7303 | ICD-9 | periostitis without mention of ostemyelitis |
| 73030 | ICD-9 | periostitis, without mention of osteomyelitis, site unspecified |
| 73031 | ICD-9 | periostitis, without mention of osteomyelitis, shoulder region |
| 73032 | ICD-9 | periostitis, without mention of osteomyelitis, upper arm |
| 73033 | ICD-9 | periostitis, without mention of osteomyelitis, forearm |
| 73034 | ICD-9 | periostitis, without mention of osteomyelitis, hand |
| 73035 | ICD-9 | periostitis, without mention of osteomyelitis, pelvic region and thigh |
| 73036 | ICD-9 | periostitis, without mention of osteomyelitis, lower leg |
| 73037 | ICD-9 | periostitis, without mention of osteomyelitis, ankle and foot |
| 73038 | ICD-9 | periostitis, without mention of osteomyelitis, other specified sites |
| 73039 | ICD-9 | periostitis, without mention of osteomyelitis, multiple sites |
| 7307 | ICD-9 | osteopathy resulting from poliomyelitis |
| 73070 | ICD-9 | osteopathy resulting from poliomyelitis, site unspecified |
| 73071 | ICD-9 | osteopathy resulting from poliomyelitis, shoulder region |
| 73072 | ICD-9 | osteopathy resulting from poliomyelitis, upper arm |
| 73073 | ICD-9 | osteopathy resulting from poliomyelitis, forearm |
| 73074 | ICD-9 | osteopathy resulting from poliomyelitis, hand |
| 73075 | ICD-9 | osteopathy resulting from poliomyelitis, pelvic region and thigh |
| 73077 | ICD-9 | osteopathy resulting from poliomyelitis, ankle and foot |
| 73078 | ICD-9 | osteopathy resulting from poliomyelitis, other specified sites |
| 73079 | ICD-9 | osteopathy resulting from poliomyelitis, multiple sites |
| 7308 | ICD-9 | other infections involving bone in disease classified elsewhere |
| 73080 | ICD-9 | other infections involving bone in diseases classified elsewhere, site unspecified |
| 73081 | ICD-9 | other infections involving bone in diseases classified elsewhere, shoulder region |
| 78552 | ICD-9 | septic shock |
| 7854 | ICD-9 | gangrene |
| 7907 | ICD-9 | bacteremia |
| 9583 | ICD-9 | post traumatic wound infection |
| 99591 | ICD-9 | sepsis |
| 99592 | ICD-9 | severe sepsis |
| 9966 | ICD-9 | infection and inflammatory reaction due to internal prosthetic device implant and graft |
| 99660 | ICD-9 | infection and inflammatory reaction due to unspecified device, implant, and graft |
| 99661 | ICD-9 | infection and inflammatory reaction due to cardiac device, implant, and graft |
| 99662 | ICD-9 | infection and inflammatory reaction due to other vascular device, implant, and graft |
| 99663 | ICD-9 | infection and inflammatory reaction due to nervous system device, implant, and graft |
| 99664 | ICD-9 | infection and inflammatory reaction due to indwelling urinary catheter |
| 99665 | ICD-9 | infection and inflammatory reaction due to other genitourinary device, implant, and graft |
| 99666 | ICD-9 | infection and inflammatory reaction due to internal joint prosthesis |
| 99667 | ICD-9 | infection and inflammatory reaction due to other internal orthopedic device, implant, and graft |
| 99668 | ICD-9 | infection and inflammatory reaction due to peritoneal dialysis catheter |
| 99669 | ICD-9 | infection and inflammatory reaction due to other internal prosthetic device, implant, and graft |
| 9985 | ICD-9 | postoperative infection |
| 99851 | ICD-9 | infected postoperative seroma |
| 99859 | ICD-9 | other postoperative infection |
| 9993 | ICD-9 | other infection due to medical care |
| 99931 | ICD-9 | infection due to central venous catheter |
| 99932 | ICD-9 | bloodstream infection due to central venous catheter |
| 99933 | ICD-9 | local infection due to central venous catheter |
| 99934 | ICD-9 | acute infection following transfusion, infusion, or injection of blood and blood products |
| 99939 | ICD-9 | infection following other infusion, injection, transfusion, or vaccination |
| A01 | ICD-10 | typhoid and paratyphoid fevers |
| A0100 | ICD-10 | typhoid fever |
| A0100 | ICD-10 | typhoid and paratyphoid fevers |
| A011 | ICD-10 | paratyphoid fever a |
| A012 | ICD-10 | paratyphoid fever b |
| A013 | ICD-10 | paratyphoid fever c |
| A014 | ICD-10 | paratyphoid fever, unspecified |
| A020 | ICD-10 | salmonella gastroenteritis |
| A021 | ICD-10 | salmonella septicemia |
| A021 | ICD-10 | other salmonella infections |
| A021 | ICD-10 | sepsis |
| A022 | ICD-10 | other salmonella infections |
| A0220 | ICD-10 | localized salmonella infection |
| A0221 | ICD-10 | salmonella meningitis |
| A0222 | ICD-10 | salmonella pneumonia |
| A0223 | ICD-10 | salmonella arthritis |
| A0224 | ICD-10 | salmonella osteomyelitis |
| A0229 | ICD-10 | other localized salmonella infections |
| A028 | ICD-10 | other specified salmonella infections |
| A028 | ICD-10 | other salmonella infections |
| A029 | ICD-10 | salmonella infection |
| A029 | ICD-10 | other salmonella infections |
| A030 | ICD-10 | shigella dysenteriae |
| A030 | ICD-10 | shigellosis |
| A031 | ICD-10 | shigella flexneri |
| A031 | ICD-10 | shigellosis |
| A032 | ICD-10 | shigella boydii |
| A032 | ICD-10 | shigellosis |
| A033 | ICD-10 | shigella sonnei |
| A038 | ICD-10 | other specified shigella infections |
| A038 | ICD-10 | shigellosis |
| A039 | ICD-10 | shigellosis, unspecified |
| A039 | ICD-10 | shigellosis |
| A040 | ICD-10 | intestinal infection due to enteropathogenic e coli |
| A041 | ICD-10 | intestinal infection due to enterotoxigenic e coli |
| A042 | ICD-10 | intestinal infection due to enteroinvasive e coli |
| A043 | ICD-10 | intestinal infection due to enterohemorrhagic e coli |
| A044 | ICD-10 | intestinal infection due to e coli |
| A044 | ICD-10 | intestinal infection due to other intestinal e coli infections |
| A045 | ICD-10 | intestinal infection due to campylobacter |
| A046 | ICD-10 | intestinal infection due to yersinia enterocolitica |
| A047 | ICD-10 | intestinal infection due to clostridium difficile |
| A048 | ICD-10 | intestinal infection due to arizona group of paracolon bacilli |
| A048 | ICD-10 | intestinal infection due to staphylococcus |
| A048 | ICD-10 | intestinal infection due to pseudomonas |
| A048 | ICD-10 | intestinal infection due to other anaerobes |
| A049 | ICD-10 | bacterial enteritis |
| A080 | ICD-10 | enteritis due to rotavirus |
| A0811 | ICD-10 | enteritis due to norwalk virus |
| A0819 | ICD-10 | enteritis due to other small round viruses [srv s] |
| A082 | ICD-10 | enteritis due to adenovirus |
| A0831 | ICD-10 | enteritis due to calicivirus |
| A0832 | ICD-10 | enteritis due to astrovirus |
| A0839 | ICD-10 | enteritis due to enterovirus not elsewhere classified |
| A0839 | ICD-10 | enteritis due to other viral enteritis |
| A088 | ICD-10 | intestinal infection due to other organism |
| A227 | ICD-10 | sepsis |
| A267 | ICD-10 | sepsis |
| A327 | ICD-10 | sepsis |
| A389 | ICD-10 | scarlet fever |
| A390 | ICD-10 | meningococcal meningitis |
| A391 | ICD-10 | waterhouse-friderichsen syndrome, meningococcal |
| A394 | ICD-10 | meningococcemia |
| A3950 | ICD-10 | meningococcal carditis, unspecified |
| A3951 | ICD-10 | meningococcal endocarditis |
| A3952 | ICD-10 | meningococcal myocarditis |
| A3953 | ICD-10 | meningococcal pericarditis |
| A3981 | ICD-10 | meningococcal encephalitis |
| A3982 | ICD-10 | meningococcal optic neuritis |
| A3983 | ICD-10 | meningococcal arthropathy |
| A3989 | ICD-10 | other specified meningococcal infections |
| A40, | ICD-10 | sepsis |
| A400 | ICD-10 | streptococcal |
| A401 | ICD-10 | streptococcal |
| A403 | ICD-10 | streptococcal |
| A408, | ICD-10 | streptococcal |
| A409 | ICD-10 | streptococcal |
| A41 | ICD-10 | sepsis |
| A4152 | ICD-10 | sepsis |
| A419 | ICD-10 | sepsis |
| A420 | ICD-10 | pulmonary actinomycotic infection |
| A420 | ICD-10 | pulmonary |
| A421 | ICD-10 | abdominal actinomycotic infection |
| A422 | ICD-10 | cervicofacial actinomycotic infection |
| A427 | ICD-10 | sepsis |
| A4281 | ICD-10 | actinomycotic infection of other specified sites |
| A4282 | ICD-10 | actinomycotic infection of other specified sites |
| A4289 | ICD-10 | actinomycotic infection of other specified sites |
| A429 | ICD-10 | actinomycotic infection of unspecified site |
| A438 | ICD-10 | actinomycotic infection of other specified sites |
| A439 | ICD-10 | actinomycotic infection of unspecified site |
| A46 | ICD-10 | erysipelas |
| A480 | ICD-10 | gas gangrene |
| A481 | ICD-10 | pneumonia due to legionnaires disease |
| A483 | ICD-10 | toxic shock syndrome |
| A4851 | ICD-10 | infant botulism |
| A4852 | ICD-10 | wound botulism |
| A488 | ICD-10 | necrobacillosis |
| A488 | ICD-10 | other specified bacterial diseases |
| A5486 | ICD-10 | sepsis |
| A690 | ICD-10 | vincent s angina |
| A691 | ICD-10 | vincent s angina |
| B375 | ICD-10 | candidal meningitis |
| B375 | ICD-10 | candidal meningitis |
| B376 | ICD-10 | candidal endocarditis |
| B376 | ICD-10 | candidal endocarditis |
| B377 | ICD-10 | sepsis |
| B3781 | ICD-10 | candidal esophagitis |
| B3782 | ICD-10 | candidal enteritis |
| B3784 | ICD-10 | candidal otitis externa |
| B380 | ICD-10 | other forms of progressive coccidioidomycosis |
| B381 | ICD-10 | chronic pulmonary coccidioidomycosis |
| B381 | ICD-10 | pulmonary coccidioidomycosis, unspecified |
| B382 | ICD-10 | coccidioidomycosis, unspecified |
| B383 | ICD-10 | primary extrapulmonary coccidioidomycosis |
| B384 | ICD-10 | primary extrapulmonary coccidioidomycosis |
| B384 | ICD-10 | coccidioidal meningitis |
| B387 | ICD-10 | primary extrapulmonary coccidioidomycosis |
| B388 | ICD-10 | primary extrapulmonary coccidioidomycosis |
| B389 | ICD-10 | primary extrapulmonary coccidioidomycosis |
| B393 | ICD-10 | infection by histoplasma capsulatum, other |
| B394 | ICD-10 | infection by histoplasma capsulatum, without mention of manifestation |
| B395 | ICD-10 | infection by histoplasma duboisii, without mention of manifestation |
| B399 | ICD-10 | histoplasmosis, unspecified, without mention of manifestation |
| B399 | ICD-10 | histoplasmosis, unspecified, endocarditis |
| B409 | ICD-10 | blastomycotic infection |
| B410 | ICD-10 | blastomycosis |
| B419 | ICD-10 | paracoccidioidomycosis |
| B420 | ICD-10 | sporotrichosis |
| B421 | ICD-10 | sporotrichosis |
| B427 | ICD-10 | sporotrichosis |
| B429 | ICD-10 | sporotrichosis |
| B439 | ICD-10 | chromoblastomycosis |
| B449 | ICD-10 | aspergillosis |
| B450 | ICD-10 | cryptococcosis |
| B451 | ICD-10 | cryptococcal meningitis |
| B457 | ICD-10 | cryptococcosis |
| B459 | ICD-10 | cryptococcosis |
| B469 | ICD-10 | zygomycosis [phycomycosis or mucormycosis] |
| B470 | ICD-10 | mycotic mycetomas |
| B471 | ICD-10 | actinomycotic infection of unspecified site |
| B479 | ICD-10 | madura foot |
| B480 | ICD-10 | paracoccidioidomycosis |
| B481 | ICD-10 | rhinosporidiosis |
| B482 | ICD-10 | allescheriosis [petriellidosis] |
| B488 | ICD-10 | infection by dematiacious fungi [phaehyphomycosis] |
| B49 | ICD-10 | other and unspecified mycoses |
| E832 | ICD-10 | other specified local infections of skin and subcutaneous tissue |
| G02 | ICD-10 | histoplasmosis, unspecified, meningitis |
| G02 | ICD-10 | infection by histoplasma capsulatum, meningitis |
| G02 | ICD-10 | infection by histoplasma duboisii, meningitis |
| G02 | ICD-10 | meningitis in other fungal diseases |
| G060 | ICD-10 | lobomycosis |
| G061 | ICD-10 | intracranial abscess |
| G062 | ICD-10 | intraspinal abscess |
| H0500 | ICD-10 | acute inflammation of orbit |
| H32 | ICD-10 | infection by histoplasma duboisii, retinitis |
| H32 | ICD-10 | infection by histoplasma capsulatum, without mention of manifestation |
| H32 | ICD-10 | infection by histoplasma capsulatum, retinitis |
| H32 | ICD-10 | histoplasmosis, unspecified, retinitis |
| H440 | ICD-10 | acute endophthalmitis |
| H440 | ICD-10 | chronic endophthalmitis |
| H44009 | ICD-10 | chronic endophthalmitis |
| H4401 | ICD-10 | panophthalmitis |
| H44011 | ICD-10 | panophthalmitis |
| H44012 | ICD-10 | panophthalmitis |
| H44013 | ICD-10 | panophthalmitis |
| H44019 | ICD-10 | panophthalmitis |
| H4402, | ICD-10 | vitreous abscess |
| H44021 | ICD-10 | vitreous abscess |
| H44022 | ICD-10 | vitreous abscess |
| H44023, | ICD-10 | vitreous abscess |
| H44029 | ICD-10 | vitreous abscess |
| H4409 | ICD-10 | acute endophthalmitis |
| H6000 | ICD-10 | infective otitis externa |
| H6010 | ICD-10 | infective otitis externa |
| H6020 | ICD-10 | malignant otitis externa |
| H60319 | ICD-10 | infective otitis externa |
| H60329 | ICD-10 | infective otitis externa |
| H60339 | ICD-10 | acute swimmers ear |
| H60399 | ICD-10 | infective otitis externa |
| H60399 | ICD-10 | other chronic infective otitis externa |
| H60509 | ICD-10 | other acute otitis externa |
| H60519 | ICD-10 | other acute otitis externa |
| H60529 | ICD-10 | other acute otitis externa |
| H60549 | ICD-10 | other acute otitis externa |
| H60559 | ICD-10 | other acute otitis externa |
| H60599 | ICD-10 | other acute otitis externa |
| H6060 | ICD-10 | other chronic otitis externa |
| H608X1 | ICD-10 | other chronic otitis externa |
| H6090 | ICD-10 | other chronic otitis externa |
| H6193 | ICD-10 | acute infection of pinna |
| H6240 | ICD-10 | other acute infections of external ear |
| H628X1 | ICD-10 | chronic mycotic otitis externa |
| H70009 | ICD-10 | acute mastoiditis without complications |
| H7001, | ICD-10 | subperiosteal abscess of mastoid |
| H70011 | ICD-10 | subperiosteal abscess of mastoid |
| H70012 | ICD-10 | subperiosteal abscess of mastoid |
| H70013 | ICD-10 | subperiosteal abscess of mastoid |
| H70019 | ICD-10 | subperiosteal abscess of mastoid |
| H70019 | ICD-10 | subperiosteal abscess of mastoid |
| H70091 | ICD-10 | acute mastoiditis with other complications |
| H70092 | ICD-10 | acute mastoiditis with other complications |
| H70093 | ICD-10 | acute mastoiditis with other complications |
| H70099 | ICD-10 | acute mastoiditis with other complications |
| H70099 | ICD-10 | acute mastoiditis with other complications |
| H7010 | ICD-10 | chronic mastoiditis |
| H70209 | ICD-10 | petrositis, unspecified |
| H70219 | ICD-10 | acute petrositis |
| H70229 | ICD-10 | chronic petrositis |
| I308 | ICD-10 | acute pericarditis |
| I32 | ICD-10 | infection by histoplasma capsulatum, pericarditis |
| I32 | ICD-10 | infection by histoplasma duboisii, pericarditis |
| I32 | ICD-10 | histoplasmosis, unspecified, pericarditis |
| I330 | ICD-10 | acute and subacute bacterial endocarditis |
| I39 | ICD-10 | infection by histoplasma duboisii, endocarditis |
| I39 | ICD-10 | acute and subacute infective endocarditis in diseases classified elsewhere |
| I39 | ICD-10 | infection by histoplasma capsulatum, endocarditis |
| I96 | ICD-10 | gangrene |
| J0100 | ICD-10 | acute maxillary sinusitis |
| J0110 | ICD-10 | acute frontal sinusitis |
| J0120 | ICD-10 | acute ethmoidal sinusitis |
| J0130 | ICD-10 | acute sphenoidal sinusitis |
| J0140 | ICD-10 | other acute sinusitis |
| J0190 | ICD-10 | acute sinusitis |
| J020 | ICD-10 | streptococcal sore throat |
| J029 | ICD-10 | acute pharyngitis |
| J0300 | ICD-10 | streptococcal sore throat |
| J0390 | ICD-10 | acute tonsilitis |
| J13 | ICD-10 | pneumococcal pneumonia |
| J14 | ICD-10 | pneumonia due to hemophilus influenzae [h influenzae] |
| J150 | ICD-10 | pneumonia due to klebsiella pneumoniae |
| J151 | ICD-10 | pneumonia due to pseudomonas |
| J1520 | ICD-10 | pneumonia due to staphylococcus, unspecified |
| J15211 | ICD-10 | methicillin susceptible pneumonia due to staphylococcus aureus |
| J15212 | ICD-10 | methicillin resistant pneumonia due to staphylococcus aureus |
| J1529 | ICD-10 | other staphylococcus pneumonia |
| J153 | ICD-10 | pneumonia due to streptococcus, group b |
| J154 | ICD-10 | pneumonia due to streptococcus, unspecified |
| J154 | ICD-10 | pneumonia due to streptococcus, group a |
| J154 | ICD-10 | pneumonia due to other streptococcus |
| J155 | ICD-10 | pneumonia due to escherichia coli [e coli] |
| J156 | ICD-10 | pneumonia due to other gram-negative bacteria |
| J158 | ICD-10 | pneumonia due to anaerobes |
| J158 | ICD-10 | pneumonia due to other specified bacteria |
| J180 | ICD-10 | bronchopneumonia |
| J181 | ICD-10 | pneumococcal pneumonia |
| J189 | ICD-10 | pneumonia, organism unspec |
| J36 | ICD-10 | peritonsillar abscess |
| J441 | ICD-10 | acute exacerbation of obstructive chronic bronchitis |
| J471 | ICD-10 | bronchiectasis |
| J479 | ICD-10 | bronchiectasis |
| J850 | ICD-10 | abscess of lung |
| J851 | ICD-10 | abscess of lung |
| J852 | ICD-10 | abscess of lung |
| J853 | ICD-10 | abscess of lung |
| J860 | ICD-10 | empyema with fistula |
| J869 | ICD-10 | empyema without mention of fistula |
| K046 | ICD-10 | periapical abscess with sinus |
| K047 | ICD-10 | periapical abscess without sinus |
| K122 | ICD-10 | cellulitis and abscess of salivary gland |
| K122 | ICD-10 | cellulitis and abscess of face |
| K352 | ICD-10 | acute appendicitis with generalized peritonitis |
| K353 | ICD-10 | acute appendicitis with peritoneal abscess |
| K3580 | ICD-10 | acute appendicitis without mention of peritonitis |
| K3589 | ICD-10 | acute appendicitis without mention of peritonitis |
| K36 | ICD-10 | other appendicitis |
| K37 | ICD-10 | appendicitis |
| K5712 | ICD-10 | diverticulitis of small intestine (without mention of hemorrhage) |
| K5712 | ICD-10 | diverticulitis of small intestine (without mention of hemorrhage) |
| K5713 | ICD-10 | diverticulitis of small intestine with hemorrhage |
| K5713 | ICD-10 | diverticulitis of small intestine (without mention of hemorrhage) |
| K5732 | ICD-10 | diverticulitis of colon (without mention of hemorrhage) |
| K5733 | ICD-10 | diverticulitis of colon with hemorrhage |
| K610 | ICD-10 | abscess of anal and rectal regions |
| K611 | ICD-10 | abscess of anal and rectal regions |
| K613 | ICD-10 | abscess of anal and rectal regions |
| K650 | ICD-10 | peritonitis (acute) generalized |
| K650 | ICD-10 | other suppurative peritonitis |
| K651 | ICD-10 | peritoneal abscess |
| K652 | ICD-10 | spontaneous bacterial peritonitis |
| K653 | ICD-10 | choleperitonitis |
| K654 | ICD-10 | sclerosing mesenteritis |
| K658 | ICD-10 | pneumococcal peritonitis |
| K658 | ICD-10 | other specified peritonitis |
| K659 | ICD-10 | unspecified peritonitis |
| K67 | ICD-10 | peritonitis in infectious diseases classified elsewhere |
| K6812 | ICD-10 | psoas muscle abscess |
| K6812 | ICD-10 | psoas muscle abscess |
| K6819 | ICD-10 | other retroperitoneal abscess |
| K689 | ICD-10 | other retroperitoneal infections |
| K810 | ICD-10 | acute cholecystitis |
| K811 | ICD-10 | chronic cholecystitis |
| K812 | ICD-10 | acute and chronic cholecystitis |
| K819 | ICD-10 | cholecystitis, unspecified |
| K857 | ICD-10 | other disorders of gallbladder |
| K9081 | ICD-10 | whipple s disease |
| K9402 | ICD-10 | infection of colostomy or enterostomy |
| K9412 | ICD-10 | infection of colostomy or enterostomy |
| L0202 | ICD-10 | carbuncle and furuncle of face |
| L0203 | ICD-10 | carbuncle and furuncle of face |
| L0212 | ICD-10 | carbuncle and furuncle of neck |
| L0213 | ICD-10 | carbuncle and furuncle of neck |
| L02221 | ICD-10 | carbuncle and furuncle of trunk |
| L02222 | ICD-10 | carbuncle and furuncle of trunk |
| L02223 | ICD-10 | carbuncle and furuncle of trunk |
| L02224 | ICD-10 | carbuncle and furuncle of trunk |
| L02225 | ICD-10 | carbuncle and furuncle of trunk |
| L02226 | ICD-10 | carbuncle and furuncle of trunk |
| L02229 | ICD-10 | carbuncle and furuncle of trunk |
| L02231 | ICD-10 | carbuncle and furuncle of trunk |
| L02232 | ICD-10 | carbuncle and furuncle of trunk |
| L02233 | ICD-10 | carbuncle and furuncle of trunk |
| L02234 | ICD-10 | carbuncle and furuncle of trunk |
| L02235 | ICD-10 | carbuncle and furuncle of trunk |
| L02236 | ICD-10 | carbuncle and furuncle of trunk |
| L02239 | ICD-10 | carbuncle and furuncle of trunk |
| L0233 | ICD-10 | carbuncle and furuncle of buttock |
| L02429 | ICD-10 | carbuncle and furuncle of upper arm and forearm |
| L02429 | ICD-10 | carbuncle and furuncle of leg, except foot |
| L02439 | ICD-10 | carbuncle and furuncle of upper arm and forearm |
| L02439 | ICD-10 | carbuncle and furuncle of leg, except foot |
| L02529 | ICD-10 | carbuncle and furuncle of hand |
| L02539 | ICD-10 | carbuncle and furuncle of hand |
| L02629 | ICD-10 | carbuncle and furuncle of foot |
| L02639 | ICD-10 | carbuncle and furuncle of foot |
| L02821 | ICD-10 | carbuncle and furuncle of other specified sites |
| L02828 | ICD-10 | carbuncle and furuncle of other specified sites |
| L02831 | ICD-10 | carbuncle and furuncle of other specified sites |
| L02838 | ICD-10 | carbuncle and furuncle of other specified sites |
| L0292 | ICD-10 | carbuncle and furuncle of unspecified site |
| L0293 | ICD-10 | carbuncle and furuncle of unspecified site |
| L03019 | ICD-10 | cellulitis and abscess of finger, unspecified |
| L03029 | ICD-10 | cellulitis and abscess of finger, unspecified |
| L03039 | ICD-10 | cellulitis and abscess of toe, unspecified |
| L03049 | ICD-10 | cellulitis and abscess of toe, unspecified |
| L03119 | ICD-10 | cellulitis and abscess of upper arm and forearm |
| L03129 | ICD-10 | cellulitis and abscess of upper arm and forearm |
| L03211 | ICD-10 | cellulitis and abscess of face |
| L03212 | ICD-10 | cellulitis and abscess of face |
| L03221 | ICD-10 | cellulitis and abscess of neck |
| L03222 | ICD-10 | cellulitis and abscess of neck |
| L03317 | ICD-10 | cellulitis and abscess of buttock |
| L03319 | ICD-10 | cellulitis and abscess of trunk |
| L03329 | ICD-10 | cellulitis and abscess of trunk |
| L03811 | ICD-10 | cellulitis and abscess of other specified sites |
| L03818 | ICD-10 | cellulitis and abscess of other specified sites |
| L03891 | ICD-10 | cellulitis and abscess of other specified sites |
| L03898 | ICD-10 | cellulitis and abscess of other specified sites |
| L0390 | ICD-10 | cellulitis and abscess of unspecified sites |
| L0391 | ICD-10 | cellulitis and abscess of unspecified sites |
| L049 | ICD-10 | acute lymphadenitis |
| L0501 | ICD-10 | pilonidal cyst with abscess |
| L0502 | ICD-10 | pilonidal cyst with abscess |
| L080 | ICD-10 | pyoderma, unspecified |
| L081 | ICD-10 | cutaneous actinomycotic infection |
| L081 | ICD-10 | cutaneous |
| L0889 | ICD-10 | other pyoderma |
| L089 | ICD-10 | unspecified local infection of skin and subcutaneous tissue |
| L88 | ICD-10 | pyoderma gangrenosum |
| L980 | ICD-10 | pyogenic granuloma of skin and subcutaneous tissue |
| M00039 | ICD-10 | pyogenic arthritis, forearm |
| M00049 | ICD-10 | pyogenic arthritis, hand |
| M00059 | ICD-10 | pyogenic arthritis, pelvic region and thigh |
| M00069 | ICD-10 | pyogenic arthritis, lower leg |
| M00079 | ICD-10 | pyogenic arthritis, ankle and foot |
| M0009 | ICD-10 | pyogenic arthritis, multiple sites |
| M00129 | ICD-10 | pyogenic arthritis, upper arm |
| M00139 | ICD-10 | pyogenic arthritis, forearm |
| M00149 | ICD-10 | pyogenic arthritis, hand |
| M00159 | ICD-10 | pyogenic arthritis, pelvic region and thigh |
| M00169 | ICD-10 | pyogenic arthritis, lower leg |
| M00179 | ICD-10 | pyogenic arthritis, ankle and foot |
| M0019 | ICD-10 | pyogenic arthritis, multiple sites |
| M00229 | ICD-10 | pyogenic arthritis, upper arm |
| M00239 | ICD-10 | pyogenic arthritis, forearm |
| M00249 | ICD-10 | pyogenic arthritis, hand |
| M00259 | ICD-10 | pyogenic arthritis, pelvic region and thigh |
| M00269 | ICD-10 | pyogenic arthritis, lower leg |
| M00279 | ICD-10 | pyogenic arthritis, ankle and foot |
| M0029 | ICD-10 | pyogenic arthritis, multiple sites |
| M00829 | ICD-10 | pyogenic arthritis, upper arm |
| M00839 | ICD-10 | pyogenic arthritis, forearm |
| M00849 | ICD-10 | pyogenic arthritis, hand |
| M00859 | ICD-10 | pyogenic arthritis, pelvic region and thigh |
| M00869 | ICD-10 | pyogenic arthritis, lower leg |
| M00869 | ICD-10 | arthropathy associated with infections |
| M0087 | ICD-10 | arthropathy associated with infections |
| M00871 | ICD-10 | arthropathy associated with infections |
| M00872 | ICD-10 | arthropathy associated with infections |
| M00879 | ICD-10 | pyogenic arthritis, ankle and foot |
| M00879 | ICD-10 | arthropathy associated with infections |
| M0088 | ICD-10 | arthropathy associated with infections |
| M0089 | ICD-10 | pyogenic arthritis, multiple sites |
| M0089 | ICD-10 | arthropathy associated with infections |
| M009 | ICD-10 | arthropathy associated with infections |
| M4620 | ICD-10 | unspecified osteomyelitis, other specified sites |
| M60009 | ICD-10 | tropical pyomyositis |
| M8610 | ICD-10 | acute osteomyelitis, site unspecified |
| M86119 | ICD-10 | acute osteomyelitis, shoulder region |
| M86129 | ICD-10 | acute osteomyelitis, upper arm |
| M86139 | ICD-10 | acute osteomyelitis, forearm |
| M86149 | ICD-10 | acute osteomyelitis, hand |
| M86159 | ICD-10 | acute osteomyelitis, pelvic region and thigh |
| M86169 | ICD-10 | acute osteomyelitis, lower leg |
| M86179 | ICD-10 | acute osteomyelitis, ankle and foot |
| M8618 | ICD-10 | acute osteomyelitis, other specified sites |
| M8619 | ICD-10 | acute osteomyelitis, multiple sites |
| M8620 | ICD-10 | acute osteomyelitis, site unspecified |
| M86219 | ICD-10 | acute osteomyelitis, shoulder region |
| M86229 | ICD-10 | acute osteomyelitis, upper arm |
| M86239 | ICD-10 | acute osteomyelitis, forearm |
| M86249 | ICD-10 | acute osteomyelitis, hand |
| M86259 | ICD-10 | acute osteomyelitis, pelvic region and thigh |
| M86269 | ICD-10 | acute osteomyelitis, lower leg |
| M86269 | ICD-10 | acute osteomyelitis, ankle and foot |
| M8628 | ICD-10 | acute osteomyelitis, other specified sites |
| M8629 | ICD-10 | chronic osteomyelitis |
| M8660 | ICD-10 | chronic osteomyelitis, site unspecified |
| M86619 | ICD-10 | chronic osteomyelitis, shoulder region |
| M86629 | ICD-10 | chronic osteomyelitis, upper arm |
| M86639 | ICD-10 | chronic osteomyelitis, forearm |
| M86642 | ICD-10 | chronic osteomyelitis, hand |
| M86659 | ICD-10 | chronic osteomyelitis, pelvic region and thigh |
| M86669 | ICD-10 | chronic osteomyelitis, lower leg |
| M86679 | ICD-10 | chronic osteomyelitis, ankle and foot |
| M8668 | ICD-10 | chronic osteomyelitis, other specified sites |
| M8669 | ICD-10 | chronic osteomyelitis, multiple sites |
| M869 | ICD-10 | unspecified osteomyelitis, site unspecified |
| M869 | ICD-10 | unspecified osteomyelitis, multiple sites |
| M8960 | ICD-10 | osteopathy resulting from poliomyelitis, site unspecified |
| M89619 | ICD-10 | osteopathy resulting from poliomyelitis, shoulder region |
| M89629 | ICD-10 | osteopathy resulting from poliomyelitis, upper arm |
| M89639 | ICD-10 | osteopathy resulting from poliomyelitis, forearm |
| M89649 | ICD-10 | osteopathy resulting from poliomyelitis, hand |
| M89659 | ICD-10 | osteopathy resulting from poliomyelitis, pelvic region and thigh |
| M89679 | ICD-10 | osteopathy resulting from poliomyelitis, ankle and foot |
| M8968 | ICD-10 | osteopathy resulting from poliomyelitis, other specified sites |
| M8969 | ICD-10 | osteopathy resulting from poliomyelitis, multiple sites |
| M9080 | ICD-10 | other infections involving bone in diseases classified elsewhere, site unspecified |
| M90819 | ICD-10 | other infections involving bone in diseases classified elsewhere, shoulder region |
| N10 | ICD-10 | acute pyelonephritis |
| N10 | ICD-10 | acute pyelonephritis without lesion of renal medullary necrosis |
| N110 | ICD-10 | chronic pyelonephritis |
| N110 | ICD-10 | chronic pyelonephritis without lesion of renal medullary necrosis |
| N118 | ICD-10 | chronic pyelonephritis with lesion of renal medullary necrosis |
| N12 | ICD-10 | other pyelonephritis or pyonephrosis, not specified as acute or chronic |
| N151 | ICD-10 | acute pyelonephritis with lesion of renal medullary necrosis |
| N159 | ICD-10 | pyelitis or pyelonephritis in diseases classified elsewhere |
| N16 | ICD-10 | pyelonephritis, unspecified |
| N2884 | ICD-10 | renal and perinephric abscess |
| N2885 | ICD-10 | renal and perinephric abscess |
| N2886 | ICD-10 | renal and perinephric abscess |
| O91111 | ICD-10 | abscess of breast associated with childbirth, delivered, with or without mention of antepartum condition |
| O91112 | ICD-10 | abscess of breast associated with childbirth, delivered, with or without mention of antepartum condition |
| O91113 | ICD-10 | abscess of breast associated with childbirth, delivered, with or without mention of antepartum condition |
| O91119 | ICD-10 | abscess of breast associated with childbirth, unspecified as to episode of care or not applicable |
| O9112 | ICD-10 | abscess of breast associated with childbirth, delivered, with mention of postpartum complication |
| R652 | ICD-10 | severe sepsis |
| R6520 | ICD-10 | severe sepsis |
| R6521 | ICD-10 | severe sepsis |
| R7881 | ICD-10 | bacteremia |
| T79XXA | ICD-10 | post traumatic wound infection |
| T80211A | ICD-10 | infection due to central venous catheter |
| T80212A | ICD-10 | bloodstream infection due to central venous catheter |
| T80219A | ICD-10 | other infection due to medical care |
| T8022XA | ICD-10 | local infection due to central venous catheter |
| T8029XA | ICD-10 | acute infection following transfusion, infusion, or injection of blood and blood products |
| T826XXA | ICD-10 | infection and inflammatory reaction due to cardiac device, implant, and graft |
| T827XXA | ICD-10 | infection and inflammatory reaction due to other vascular device, implant, and graft |
| T8351XA | ICD-10 | infection and inflammatory reaction due to indwelling urinary catheter |
| T8359XA | ICD-10 | infection and inflammatory reaction due to other genitourinary device, implant, and graft |
| T836XXA | ICD-10 | infection and inflammatory reaction due to other genitourinary device, implant, and graft |
| T8450XA | ICD-10 | infection and inflammatory reaction due to internal joint prosthesis |
| T8460XA | ICD-10 | infection and inflammatory reaction due to other internal orthopedic device, implant, and graft |
| T847XXA, | ICD-10 | infection and inflammatory reaction due to internal prosthetic device implant and graft |
| T847XXD | ICD-10 | infection and inflammatory reaction due to internal prosthetic device implant and graft |
| T847XXS | ICD-10 | infection and inflammatory reaction due to internal prosthetic device implant and graft |
| T857 | ICD-10 | infection and inflammatory reaction due to internal prosthetic device implant and graft |
| T8571XA | ICD-10 | infection and inflammatory reaction due to peritoneal dialysis catheter |
| T8579XA | ICD-10 | infection and inflammatory reaction due to nervous system device, implant, and graft |
| T8579XA | ICD-10 | infection and inflammatory reaction due to internal prosthetic device implant and graft |
| T8579XA | ICD-10 | infection and inflammatory reaction due to internal prosthetic device implant and graft |
| T8579XD | ICD-10 | infection and inflammatory reaction due to internal prosthetic device implant and graft |
| T8579XS | ICD-10 | infection and inflammatory reaction due to internal prosthetic device implant and graft |
| T859 | ICD-10 | infection and inflammatory reaction due to internal prosthetic device implant and graft |
| T880XXA | ICD-10 | infection following other infusion, injection, transfusion, or vaccination |
| **Pneumonia** | | |
| 11515 | ICD-9 | Infection by Histoplasma duboisii, pneumonia |
| 11595 | ICD-9 | Histoplasmosis, unspecified, pneumonia |
| 1304 | ICD-9 | Toxoplasma pneumonitis |
| 1363 | ICD-9 | Pneumocystosis |
| 480 | ICD-9 | Viral pneumonia |
| 4801 | ICD-9 | Pneumonia due to respiratory syncytial virus |
| 4802 | ICD-9 | Pneumonia due to parainfluenza virus |
| 4803 | ICD-9 | Pneumonia due to SARS-associated coronavirus |
| 4808 | ICD-9 | Pneumonia due to other virus not elsewhere classified |
| 4809 | ICD-9 | Viral pneumonia, unspecified |
| 482 | ICD-9 | Other bacterial pneumonia |
| 4821 | ICD-9 | Pneumonia due to Pseudomonas |
| 4822 | ICD-9 | Pneumonia due to Hemophilus influenzae [H influenzae] |
| 4823 | ICD-9 | Pneumonia due to streptococcus |
| 00322 | ICD-9 | Salmonella pneumonia |
| 0203 | ICD-9 | Primary pneumonic plague |
| 0204 | ICD-9 | Secondary pneumonic plague |
| 0205 | ICD-9 | Pneumonic plague NOS |
| 0521 | ICD-9 | Varicella pneumonitis |
| 0551 | ICD-9 | Postmeasles pneumonia |
| 0730 | ICD-9 | Ornithosis pneumonia |
| 11505 | ICD-9 | Infection by Histoplasma capsulatum, pneumonia |
| 4800 | ICD-9 | Pneumonia due to adenovirus |
| 4801 | ICD-9 | Pneumonia due to respiratory syncytial virus |
| 4802 | ICD-9 | Pneumonia due to parainfluenza virus |
| 4803 | ICD-9 | Pneumonia due to SARS-associated coronavirus |
| 4808 | ICD-9 | Pneumonia due to other virus not elsewhere classified |
| 4809 | ICD-9 | Viral pneumonia, unspecified |
| 481 | ICD-9 | Pneumococcal pneumonia [Streptococcus pneumoniae pneumonia] |
| 481 | ICD-9 | Pneumococcal pneumonia [Streptococcus pneumoniae pneumonia] |
| 482 | ICD-9 | Other bacterial pneumonia |
| 4820 | ICD-9 | Pneumonia due to Klebsiella pneumoniae |
| 4821 | ICD-9 | Pneumonia due to Pseudomonas |
| 4822 | ICD-9 | Pneumonia due to Hemophilus influenzae [H influenzae] |
| 4823 | ICD-9 | Pneumonia due to Streptococcus |
| 48230 | ICD-9 | Pneumonia due to Streptococcus, unspecified |
| 48231 | ICD-9 | Pneumonia due to Streptococcus, group A |
| 48232 | ICD-9 | Pneumonia due to Streptococcus, group B |
| 48239 | ICD-9 | Pneumonia due to other Streptococcus |
| 4824 | ICD-9 | Pneumonia due to Staphylococcus |
| 48240 | ICD-9 | Pneumonia due to Staphylococcus, unspecified |
| 48241 | ICD-9 | Methicillin susceptible pneumonia due to Staphylococcus aureus |
| 48242 | ICD-9 | Methicillin resistant pneumonia due to Staphylococcus aureus |
| 48249 | ICD-9 | Other Staphylococcus pneumonia |
| 4828 | ICD-9 | Pneumonia due to other specified bacteria |
| 48281 | ICD-9 | Pneumonia due to anaerobes |
| 48282 | ICD-9 | Pneumonia due to escherichia coli [E coli] |
| 48283 | ICD-9 | Pneumonia due to other gram-negative bacteria |
| 48284 | ICD-9 | Pneumonia due to Legionnaires' disease |
| 48289 | ICD-9 | Pneumonia due to other specified bacteria |
| 4829 | ICD-9 | Bacterial pneumonia, unspecified |
| 483 | ICD-9 | Pneumonia due to other specified organism |
| 4830 | ICD-9 | Pneumonia due to mycoplasma pneumoniae |
| 4831 | ICD-9 | Pneumonia due to chlamydia |
| 4838 | ICD-9 | Pneumonia due to other specified organism |
| 484 | ICD-9 | Pneumonia in infectious diseases classified elsewhere |
| 4841 | ICD-9 | Pneumonia in cytomegalic inclusion disease |
| 4843 | ICD-9 | Pneumonia in whooping cough |
| 4845 | ICD-9 | Pneumonia in anthrax |
| 4846 | ICD-9 | Pneumonia in aspergillosis |
| 4847 | ICD-9 | Pneumonia in other systemic mycoses |
| 4848 | ICD-9 | Pneumonia in other infectious diseases classified elsewhere |
| 485 | ICD-9 | Bronchopneumonia, organism unspecified |
| 486 | ICD-9 | Pneumonia, organism unspecified |
| 4870 | ICD-9 | Influenza with pneumonia |
| 48801 | ICD-9 | Influenza due to identified avian influenza virus with pneumonia |
| 48811 | ICD-9 | Influenza due to identified novel H1N1 influenza virus with pneumonia |
| 48881 | ICD-9 | Influenza due to identified novel influenza A virus with pneumonia |
| 5163 | ICD-9 | Idiopathic interstitial pneumonia |
| 51630 | ICD-9 | Idiopathic interstitial pneumonia, not otherwise specified |
| 51631 | ICD-9 | Idiopathic pulmonary fibrosis |
| 51632 | ICD-9 | Idiopathic non-specific interstitial pneumonitis |
| 51633 | ICD-9 | Acute interstitial pneumonitis |
| 51635 | ICD-9 | Idiopathic lymphoid interstitial pneumonia |
| 51636 | ICD-9 | Cryptogenic organizing pneumonia |
| 51637 | ICD-9 | Desquamative interstitial pneumonia |
| 5171 | ICD-9 | Rheumatic pneumonia |
| A003 | ICD-10 | Typhoid Pneumonia |
| A0222 | ICD-10 | Salmonella Pneumonia |
| A202 | ICD-10 | Pneumonic plague |
| A310 | ICD-10 | Pulmonary mycobacterial infection |
| A3701 | ICD-10 | Whooping cough due to Bordetella pertussis with Pneumonia |
| A3711 | ICD-10 | Whooping cough due to Bordetella parapertussis with Pneumonia |
| A3781 | ICD-10 | Whooping cough due to other Bordetella species with Pneumonia |
| A3791 | ICD-10 | Whooping cough, unspecified species with Pneumonia |
| A430 | ICD-10 | Pulmonary nocardiosis |
| A5484 | ICD-10 | Gonococcal Pneumonia |
| B012 | ICD-10 | Varicella Pneumonia |
| B052 | ICD-10 | Measles complicated by Pneumonia |
| B0681 | ICD-10 | Rubella Pneumonia |
| B250 | ICD-10 | Cytomegaloviral pneumonitis |
| B583 | ICD-10 | Pulmonary toxoplasmosis |
| B59 | ICD-10 | Pneumocystosis |
| B7781 | ICD-10 | Ascariasis Pneumonia |
| J09X1 | ICD-10 | Influenza due to identified novel influenza A virus with Pneumonia |
| J09X9 | ICD-10 | Influenza due to identified novel influenza A virus with other manifestations |
| J100 | ICD-10 | Influenza due to other identified influenza virus with Pneumonia |
| J1000 | ICD-10 | Influenza due to other identified influenza virus with unspecified type of Pneumonia |
| J1001 | ICD-10 | Influenza due to other identified influenza virus with the same other identified influenza virus Pneumonia |
| J1008 | ICD-10 | Influenza due to other identified influenza virus with other specified Pneumonia |
| J1083 | ICD-10 | Influenza due to other identified influenza virus with otitis media |
| J110 | ICD-10 | Influenza due to unidentified influenza virus with Pneumonia |
| J1100 | ICD-10 | Influenza due to unidentified influenza virus with unspecified type of Pneumonia |
| J1108 | ICD-10 | Influenza due to unidentified influenza virus with specified Pneumonia |
| J12 | ICD-10 | Viral Pneumonia, not elsewhere classified |
| J120 | ICD-10 | Adenoviral Pneumonia |
| J121 | ICD-10 | Respiratory syncytial virus Pneumonia |
| J122 | ICD-10 | Parainfluenza virus Pneumonia |
| J123 | ICD-10 | Human metapneumovirus Pneumonia |
| J128 | ICD-10 | Other viral Pneumonia |
| J1281 | ICD-10 | Pneumonia due to SARS-associated coronavirus |
| J1289 | ICD-10 | Other viral Pneumonia |
| J129 | ICD-10 | Viral Pneumonia, unspecified |
| J13 | ICD-10 | Pneumonia due to Streptococcus Pneumoniae |
| J14 | ICD-10 | Pneumonia due to Hemophilus influenzae |
| J15 | ICD-10 | Bacterial Pneumonia, not elsewhere classified |
| J150 | ICD-10 | Pneumonia due to Klebsiella Pneumoniae |
| J151 | ICD-10 | Pneumonia due to Pseudomonas |
| J1520 | ICD-10 | Pneumonia due to staphylococcus, unspecified |
| J1521 | ICD-10 | Pneumonia due to staphylococcus aureus |
| J15211 | ICD-10 | Pneumonia due to Methicillin susceptible Staphylococcus aureus |
| J15212 | ICD-10 | Pneumonia due to Methicillin resistant Staphylococcus aureus |
| J1529 | ICD-10 | Pneumonia due to other staphylococcus |
| J153 | ICD-10 | Pneumonia due to streptococcus, group B |
| J154 | ICD-10 | Pneumonia due to other streptococci |
| J155 | ICD-10 | Pneumonia due to Escherichia coli |
| J156 | ICD-10 | Pneumonia due to other Gram-negative bacteria |
| J157 | ICD-10 | Pneumonia due to Mycoplasma Pneumoniae |
| J158 | ICD-10 | Pneumonia due to other specified bacteria |
| J159 | ICD-10 | Unspecified bacterial Pneumonia |
| J16 | ICD-10 | Pneumonia due to other infectious organisms, not elsewhere classified |
| J160 | ICD-10 | Chlamydial Pneumonia |
| J168 | ICD-10 | Pneumonia due to other specified infectious organisms |
| J17 | ICD-10 | Pneumonia in diseases classified elsewhere |
| J18 | ICD-10 | Pneumonia, unspecified organism |
| J180 | ICD-10 | BronchoPneumonia, unspecified organism |
| J181 | ICD-10 | Lobar Pneumonia, unspecified organism |
| J182 | ICD-10 | Hypostatic Pneumonia, unspecified organism |
| J182 | ICD-10 | Hypostatic pneumonia, unspecified organism |
| J188 | ICD-10 | Other Pneumonia, unspecified organism |
| J189 | ICD-10 | Pneumonia, unspecified organism |
| J82 | ICD-10 | Pulmonary eosinophilia, not elsewhere classified |
| J8410 | ICD-10 | Pulmonary fibrosis, unspecified |
| J8411 | ICD-10 | Idiopathic interstitial Pneumonia |
| J84111 | ICD-10 | Idiopathic interstitial Pneumonia, not otherwise specified |
| J84112 | ICD-10 | Idiopathic pulmonary fibrosis |
| J84114 | ICD-10 | Acute interstitial pneumonitis |
| J84115 | ICD-10 | Respiratory bronchiolitis interstitial lung disease |
| J84116 | ICD-10 | Cryptogenic organizing Pneumonia |
| J84117 | ICD-10 | Desquamative interstitial Pneumonia |
| J8417 | ICD-10 | Other interstitial pulmonary diseases with fibrosis in diseases classified elsewhere |
| J842 | ICD-10 | Lymphoid interstitial Pneumonia |
| J84848 | ICD-10 | Other interstitial lung diseases of childhood |
| J8489 | ICD-10 | Other specified interstitial pulmonary diseases |
| J849 | ICD-10 | Interstitial pulmonary disease, unspecified |
| J851 | ICD-10 | Abscess of lung with Pneumonia |
| T6591XA | ICD-10 | Toxic effect of unspecified substance, accidental (unintentional), initial encounter |
| T6591XD | ICD-10 | Toxic effect of unspecified substance, accidental (unintentional), subsequent encounter |
| T6591XS | ICD-10 | Toxic effect of unspecified substance, accidental (unintentional), sequela |
| **Acute Respiratory Failure** | | |
| 5184 | ICD-9 | Acute edema of lung, unspecified |
| 51881 | ICD-9 | Acute respiratory failure |
| 51884 | ICD-9 | Acute and chronic respiratory failure |
| J9600 | ICD-10 | Acute respiratory failure, unspecified whether with hypoxia or hypercapnia |
| J9601 | ICD-10 | Acute respiratory failure with hypoxia |
| J9602 | ICD-10 | Acute respiratory failure with hypercapnia |
| J9620 | ICD-10 | Acute and chronic respiratory failure, unspecified whether with hypoxia or hypercapnia |
| J9621 | ICD-10 | Acute and chronic respiratory failure with hypoxia |
| J9622 | ICD-10 | Acute and chronic respiratory failure with hypercapnia |
| **Acute Renal Failure** | | |
| 5845 | ICD-9 | Acute kidney failure with lesion of tubular necrosis |
| 5846 | ICD-9 | Acute kidney failure with lesion of renal cortical necrosis |
| 5847 | ICD-9 | Acute kidney failure with lesion of renal medullary [papillary] necrosis |
| 5848 | ICD-9 | Acute kidney failure with other specified pathological lesion in kidney |
| 5849 | ICD-9 | Acute kidney failure, unspecified |
| 5856 | ICD-9 | End stage renal disease |
| N170 | ICD-10 | Acute kidney failure with tubular necrosis |
| N171 | ICD-10 | Acute kidney failure with acute cortical necrosis |
| N172 | ICD-10 | Acute kidney failure with medullary necrosis |
| N178 | ICD-10 | Other acute kidney failure |
| N179 | ICD-10 | Acute kidney failure, unspecified |
| N186 | ICD-10 | End stage renal disease |
| 586 | ICD-9 | Renal failure, unspecified |
| N19 | ICD-10 | Unspecified kidney failure |
| **Acute Heart Failure** | | |
| 42841 | ICD-9 | Acute combined systolic and diastolic heart failure |
| 42831 | ICD-9 | Acute diastolic heart failure |
| 42821 | ICD-9 | Acute systolic heart failure |
| I5041 | ICD-10 | Acute combined systolic (congestive) and diastolic (congestive) heart failure |
| I5031 | ICD-10 | Acute diastolic (congestive) heart failure |
| I50811 | ICD-10 | Acute right heart failure |
| I5021 | ICD-10 | Acute systolic (congestive) heart failure |
| 42843 | ICD-9 | Acute on chronic combined systolic and diastolic heart failure |
| 42833 | ICD-9 | Acute on chronic diastolic heart failure |
| 42823 | ICD-9 | Acute on chronic systolic heart failure |
| 42840 | ICD-9 | Combined systolic and diastolic heart failure, unspecified |
| 4280 | ICD-9 | Congestive heart failure, unspecified |
| 42830 | ICD-9 | Diastolic heart failure, unspecified |
| 4289 | ICD-9 | Heart failure, unspecified |
| 4281 | ICD-9 | Left heart failure |
| 39891 | ICD-9 | Rheumatic (congestive) heart failure |
| 42820 | ICD-9 | Systolic heart failure, unspecified |
| I5043 | ICD-10 | Acute on chronic combined systolic (congestive) and diastolic (congestive) heart failure |
| I5033 | ICD-10 | Acute on chronic diastolic (congestive) heart failure |
| I50813 | ICD-10 | Acute on chronic right heart failure |
| I5023 | ICD-10 | Acute on chronic systolic (congestive) heart failure |
| I509 | ICD-10 | Heart failure, unspecified |
| I501 | ICD-10 | Left ventricular failure |
| I0981 | ICD-10 | Rheumatic heart failure |
| I50810 | ICD-10 | Right heart failure, unspecified |
| I5040 | ICD-10 | Unspecified combined systolic (congestive) and diastolic (congestive) heart failure |
| I5030 | ICD-10 | Unspecified diastolic (congestive) heart failure |
| I5020 | ICD-10 | Unspecified systolic (congestive) heart failure |
| **Nausea and Vomiting** | | |
| 78702 | ICD-9 | nausea alone |
| R110 | ICD-10 | Nausea |
| 78701 | ICD-9 | nausea with vomiting |
| R112 | ICD-10 | Nausea with vomiting, unspecified |
| 78703 | ICD-9 | Vomiting alone |
| R111 | ICD-10 | Vomiting |
| R1110 | ICD-10 | Vomiting, unspecified |
| R1111 | ICD-10 | Vomiting without nausea |
| R1112 | ICD-10 | Projectile vomiting |
| R1113 | ICD-10 | Vomiting of fecal matter |
| R1114 | ICD-10 | Bilious vomiting |
| R1115 | ICD-10 | Cyclical vomiting syndrome unrelated to migraine |
